# Supplementary material for: Metakognitives Strategiewissen in sprachbezogenen Situationen
Source: Atypon-hosted journal article supplement (doi:10.1026/0012-1924/a000275), 2021-07-29
Supplement: 0012-1924_a000275_esm1.pdf [file 0012-1924_a000275_esm1.pdf]

# ScenEx

Name / ID \_\_\_\_\_

Datum \_\_\_\_\_

In diesem Fragebogen geht es um Situationen, die im Studium schwierig sein können. Für jede Situation gibt es verschiedene Strategien, um sie zu lösen. Ihre Aufgabe: Stellen Sie sich vor, Sie sind in dieser Situation. Wie hilfreich sind die Strategien in dieser Situation?

## Beispiel

**Sie sind auf dem Weg zu einer Vorlesung und merken, dass Sie es nicht mehr rechtzeitig schaffen. Was tun Sie?**

|                                                             | Überhaupt nicht hilfreich           |                          |                          |                          |                          | Sehr hilfreich                      |
|-------------------------------------------------------------|-------------------------------------|--------------------------|--------------------------|--------------------------|--------------------------|-------------------------------------|
| Ich kehre um. Es lohnt sich nicht, hinzugehen.              | <input checked="" type="checkbox"/> | <input type="checkbox"/>            |
| Ich beeile mich. So verpasse ich vielleicht nur den Anfang, | <input type="checkbox"/>            | <input type="checkbox"/> | <input type="checkbox"/> | <input type="checkbox"/> | <input type="checkbox"/> | <input checked="" type="checkbox"/> |

Sicherlich ist es nicht sinnvoll, nichts zu tun. Die erste Alternative ist deshalb „Überhaupt nicht hilfreich“. Besser ist es, zu versuchen, möglichst schnell zur Vorlesung zu kommen. Deshalb ist dort „Sehr hilfreich“ markiert.

Auf den folgenden Seiten finden Sie 6 Situation und dazu Strategien. Bitte bewerten Sie jede Strategie. Manche Strategien sind nicht eindeutig. Sie können mehr oder weniger hilfreich sein. Bitte wählen Sie dann eine Option dazwischen. Bitte machen Sie pro Strategie nur ein Kreuz in eines der Kästchen.

### Bibliografische Angaben:

Wisniewski, K./Lenhard, W./Parker, M./Seeger, J. (2019): Sprachbezogenes metakognitives Strategiewissen im Studienalltag internationaler Studierender: Der szenariobasierte Fragebogen ScenEx. In: *Zeitschrift für Fremdsprachenforschung* 30(1), 57-78.

**Fragebogen-Version 1 – 5.9.2018**

ScenEx ist frei zugänglich im IRIS Digital Repository: <https://www.iris-database.org/> und unter <https://go.uniwue.de/scenex>

## Szenario 1

Sie sitzen in einer Vorlesung. Der Dozent/die Dozentin spricht sehr schnell und kompliziert. Sie haben Schwierigkeiten, ihn zu verstehen. Was tun Sie?

|                                                                                                                                                              | Überhaupt<br>nicht<br>hilfreich |                          |                          |                          |                          | Sehr<br>hilfreich        |
|--------------------------------------------------------------------------------------------------------------------------------------------------------------|---------------------------------|--------------------------|--------------------------|--------------------------|--------------------------|--------------------------|
| 1. Ich konzentriere mich auf das Wichtigste und achte nicht so sehr auf die Details.                                                                         | <input type="checkbox"/>        | <input type="checkbox"/> | <input type="checkbox"/> | <input type="checkbox"/> | <input type="checkbox"/> | <input type="checkbox"/> |
| 2. Ich achte auf wichtige Schlüsselwörter.                                                                                                                   | <input type="checkbox"/>        | <input type="checkbox"/> | <input type="checkbox"/> | <input type="checkbox"/> | <input type="checkbox"/> | <input type="checkbox"/> |
| 3. Während ich zuhöre, übersetze ich im Kopf in meine Muttersprache.                                                                                         | <input type="checkbox"/>        | <input type="checkbox"/> | <input type="checkbox"/> | <input type="checkbox"/> | <input type="checkbox"/> | <input type="checkbox"/> |
| 4. Ich mache mir keine Notizen, damit ich mich auf das Hören konzentrieren kann.                                                                             | <input type="checkbox"/>        | <input type="checkbox"/> | <input type="checkbox"/> | <input type="checkbox"/> | <input type="checkbox"/> | <input type="checkbox"/> |
| 5. Wenn ich etwas nicht verstehe, mache ich mir eine kurze Notiz und folge dann weiter der Vorlesung. Erst nach der Vorlesung kehre ich zu dem Thema zurück. | <input type="checkbox"/>        | <input type="checkbox"/> | <input type="checkbox"/> | <input type="checkbox"/> | <input type="checkbox"/> | <input type="checkbox"/> |
| 6. Ich versuche, auf jedes einzelne Wort zu achten.                                                                                                          | <input type="checkbox"/>        | <input type="checkbox"/> | <input type="checkbox"/> | <input type="checkbox"/> | <input type="checkbox"/> | <input type="checkbox"/> |
| 7. Ich lese nach der Vorlesung im Lehrbuch, im Skript oder auf den PowerPoint-Folien über das Thema nach.                                                    | <input type="checkbox"/>        | <input type="checkbox"/> | <input type="checkbox"/> | <input type="checkbox"/> | <input type="checkbox"/> | <input type="checkbox"/> |

## Szenario 2

In einer Vorlesung erklärt der Dozent/die Dozentin etwas. Gleichzeitig versuchen Sie, den Text auf den PowerPoint-Folien zu lesen. Das ist zu viel auf einmal, und Sie merken, dass Sie nicht mehr folgen können. Was tun Sie?

|                                                                                                                    | Überhaupt<br>nicht<br>hilfreich |                          |                          |                          |                          | Sehr<br>hilfreich        |
|--------------------------------------------------------------------------------------------------------------------|---------------------------------|--------------------------|--------------------------|--------------------------|--------------------------|--------------------------|
| 1. Ich höre genau zu und achte darauf, welche Aspekte die Dozentin besonders betont.                               | <input type="checkbox"/>        | <input type="checkbox"/> | <input type="checkbox"/> | <input type="checkbox"/> | <input type="checkbox"/> | <input type="checkbox"/> |
| 2. Wenn meine Gedanken nicht mehr beim Thema sind, lenke ich meine Konzentration bewusst wieder auf die Vorlesung. | <input type="checkbox"/>        | <input type="checkbox"/> | <input type="checkbox"/> | <input type="checkbox"/> | <input type="checkbox"/> | <input type="checkbox"/> |
| 3. Ich überlege, welche Inhalte besonders wichtig sind, und konzentriere mich darauf.                              | <input type="checkbox"/>        | <input type="checkbox"/> | <input type="checkbox"/> | <input type="checkbox"/> | <input type="checkbox"/> | <input type="checkbox"/> |
| 4. Ich frage nach der Vorlesung andere Studierende, was das Wichtigste in der Vorlesung war.                       | <input type="checkbox"/>        | <input type="checkbox"/> | <input type="checkbox"/> | <input type="checkbox"/> | <input type="checkbox"/> | <input type="checkbox"/> |
| 5. Ich höre auf zuzuhören und lese lieber nur noch die Folien.                                                     | <input type="checkbox"/>        | <input type="checkbox"/> | <input type="checkbox"/> | <input type="checkbox"/> | <input type="checkbox"/> | <input type="checkbox"/> |
| 6. Ich schlage Wörter, die ich nicht verstehe, sofort im Wörterbuch oder im Internet nach.                         | <input type="checkbox"/>        | <input type="checkbox"/> | <input type="checkbox"/> | <input type="checkbox"/> | <input type="checkbox"/> | <input type="checkbox"/> |
| 7. Ich schreibe in der Vorlesung die Notizen von einem Studierenden ab, der neben mir sitzt.                       | <input type="checkbox"/>        | <input type="checkbox"/> | <input type="checkbox"/> | <input type="checkbox"/> | <input type="checkbox"/> | <input type="checkbox"/> |

### Szenario 3

Sie sollen einen Text zur Vorbereitung lesen. Der Text enthält sehr viele Informationen. Sie können nicht erkennen, was wichtig ist und was nicht. Was tun Sie?

|                                                                                                                     | Überhaupt<br>nicht<br>hilfreich |                          |                          |                          |                          | Sehr<br>hilfreich        |
|---------------------------------------------------------------------------------------------------------------------|---------------------------------|--------------------------|--------------------------|--------------------------|--------------------------|--------------------------|
| 1. Ich überlege, was ich zu dem Thema weiß und wovon der Text handeln könnte.                                       | <input type="checkbox"/>        | <input type="checkbox"/> | <input type="checkbox"/> | <input type="checkbox"/> | <input type="checkbox"/> | <input type="checkbox"/> |
| 2. Zuerst überfliege ich den Text, um einen Überblick über seinen Aufbau und seine Inhalte zu bekommen.             | <input type="checkbox"/>        | <input type="checkbox"/> | <input type="checkbox"/> | <input type="checkbox"/> | <input type="checkbox"/> | <input type="checkbox"/> |
| 3. Ich mache mir Notizen zum Text.                                                                                  | <input type="checkbox"/>        | <input type="checkbox"/> | <input type="checkbox"/> | <input type="checkbox"/> | <input type="checkbox"/> | <input type="checkbox"/> |
| 4. Ich lese schwierige Passagen mehrmals.                                                                           | <input type="checkbox"/>        | <input type="checkbox"/> | <input type="checkbox"/> | <input type="checkbox"/> | <input type="checkbox"/> | <input type="checkbox"/> |
| 5. Ich übersetze den ganzen Text in meine Muttersprache.                                                            | <input type="checkbox"/>        | <input type="checkbox"/> | <input type="checkbox"/> | <input type="checkbox"/> | <input type="checkbox"/> | <input type="checkbox"/> |
| 6. Ich übersetze den Text mit einem Übersetzungsprogramm/einer App (z. B. Google Translate) in meine Muttersprache. | <input type="checkbox"/>        | <input type="checkbox"/> | <input type="checkbox"/> | <input type="checkbox"/> | <input type="checkbox"/> | <input type="checkbox"/> |
| 7. Ich lese den Text nicht weiter. Lieber frage ich andere Studierende, was in dem Text steht.                      | <input type="checkbox"/>        | <input type="checkbox"/> | <input type="checkbox"/> | <input type="checkbox"/> | <input type="checkbox"/> | <input type="checkbox"/> |

#### Szenario 4

Sie müssen einen Text auf Deutsch für Ihr Studium schreiben, aber Sie haben Schwierigkeiten, Ihre Gedanken auf Deutsch auszudrücken. Was tun Sie?

|                                                                                                                                   | Überhaupt<br>nicht<br>hilfreich |                          |                          |                          |                          | Sehr<br>hilfreich        |
|-----------------------------------------------------------------------------------------------------------------------------------|---------------------------------|--------------------------|--------------------------|--------------------------|--------------------------|--------------------------|
| 1. Ich schreibe ein Textstück aus dem Internet ab, das meine Gedanken gut ausdrückt.                                              | <input type="checkbox"/>        | <input type="checkbox"/> | <input type="checkbox"/> | <input type="checkbox"/> | <input type="checkbox"/> | <input type="checkbox"/> |
| 2. Bevor ich anfangen zu schreiben, plane ich, was ich schreiben will.                                                            | <input type="checkbox"/>        | <input type="checkbox"/> | <input type="checkbox"/> | <input type="checkbox"/> | <input type="checkbox"/> | <input type="checkbox"/> |
| 3. Ich schreibe ein Textstück zuerst in meiner Muttersprache und übersetze es dann ins Deutsche.                                  | <input type="checkbox"/>        | <input type="checkbox"/> | <input type="checkbox"/> | <input type="checkbox"/> | <input type="checkbox"/> | <input type="checkbox"/> |
| 4. Während ich schreibe, behalte ich die Struktur des ganzen Textes im Blick.                                                     | <input type="checkbox"/>        | <input type="checkbox"/> | <input type="checkbox"/> | <input type="checkbox"/> | <input type="checkbox"/> | <input type="checkbox"/> |
| 5. Ich schlage in einsprachigen Wörterbüchern oder im Internet nach, wie man bestimmte Wörter oder Redewendungen verwendet.       | <input type="checkbox"/>        | <input type="checkbox"/> | <input type="checkbox"/> | <input type="checkbox"/> | <input type="checkbox"/> | <input type="checkbox"/> |
| 6. Ich schreibe erst einmal los. Dabei markiere ich aber die Stellen, bei denen ich unsicher bin, und komme später darauf zurück. | <input type="checkbox"/>        | <input type="checkbox"/> | <input type="checkbox"/> | <input type="checkbox"/> | <input type="checkbox"/> | <input type="checkbox"/> |
| 7. Wenn ich nicht weiß, wie ich einen Gedanken auf Deutsch ausdrücken soll, lasse ich ihn aus.                                    | <input type="checkbox"/>        | <input type="checkbox"/> | <input type="checkbox"/> | <input type="checkbox"/> | <input type="checkbox"/> | <input type="checkbox"/> |

## Szenario 5

Sie schreiben eine Klausur. Bei einer Multiple-Choice-Frage kommen Sie nicht weiter. Was tun Sie?

|                                                                                                                                                                 | Überhaupt<br>nicht<br>hilfreich |                          |                          |                          |                          | Sehr<br>hilfreich        |
|-----------------------------------------------------------------------------------------------------------------------------------------------------------------|---------------------------------|--------------------------|--------------------------|--------------------------|--------------------------|--------------------------|
| 1. Ich schließe zuerst Antworten aus, von denen ich weiß, dass sie falsch sind.                                                                                 | <input type="checkbox"/>        | <input type="checkbox"/> | <input type="checkbox"/> | <input type="checkbox"/> | <input type="checkbox"/> | <input type="checkbox"/> |
| 2. Ich löse zunächst leichtere Aufgaben. Wenn ich noch Zeit habe, löse ich diese Aufgabe zum Schluss.                                                           | <input type="checkbox"/>        | <input type="checkbox"/> | <input type="checkbox"/> | <input type="checkbox"/> | <input type="checkbox"/> | <input type="checkbox"/> |
| 3. Ich schaue auf die Zeit, die ich noch habe und überlege, wie viel Zeit mir für das Lösen dieser Aufgabe bleibt. Dann entscheide ich, wie ich weiter vorgehe. | <input type="checkbox"/>        | <input type="checkbox"/> | <input type="checkbox"/> | <input type="checkbox"/> | <input type="checkbox"/> | <input type="checkbox"/> |
| 4. Ich übersetze Teile der Aufgabe oder die ganze Aufgabe in meine Muttersprache.                                                                               | <input type="checkbox"/>        | <input type="checkbox"/> | <input type="checkbox"/> | <input type="checkbox"/> | <input type="checkbox"/> | <input type="checkbox"/> |
| 5. Wenn mehrere Antworten fast gleich klingen, wähle ich diese Antworten nicht aus.                                                                             | <input type="checkbox"/>        | <input type="checkbox"/> | <input type="checkbox"/> | <input type="checkbox"/> | <input type="checkbox"/> | <input type="checkbox"/> |
| 6. Wenn ich ein Wort aus der Aufgabe in einer Antwort finde, wähle ich diese Antwort aus.                                                                       | <input type="checkbox"/>        | <input type="checkbox"/> | <input type="checkbox"/> | <input type="checkbox"/> | <input type="checkbox"/> | <input type="checkbox"/> |
| 7. Ich wähle die längste Antwort.                                                                                                                               | <input type="checkbox"/>        | <input type="checkbox"/> | <input type="checkbox"/> | <input type="checkbox"/> | <input type="checkbox"/> | <input type="checkbox"/> |

## Szenario 6

In einer Klausur kommt eine Frage vor, die Sie beantworten sollen. Die Frage ist aber ziemlich lang und kompliziert formuliert. Sie verstehen nicht genau, was Sie machen sollen. Was tun Sie?

|                                                                                                                                                                 | Überhaupt<br>nicht<br>hilfreich |                          |                          |                          |                          | Sehr<br>hilfreich        |
|-----------------------------------------------------------------------------------------------------------------------------------------------------------------|---------------------------------|--------------------------|--------------------------|--------------------------|--------------------------|--------------------------|
| 1. Ich versuche, in der Aufgabenstellung Schlüsselwörter zu finden.                                                                                             | <input type="checkbox"/>        | <input type="checkbox"/> | <input type="checkbox"/> | <input type="checkbox"/> | <input type="checkbox"/> | <input type="checkbox"/> |
| 2. Ich versuche, die Bedeutung unbekannter Wörter aus dem Kontext zu erschließen oder zu erraten.                                                               | <input type="checkbox"/>        | <input type="checkbox"/> | <input type="checkbox"/> | <input type="checkbox"/> | <input type="checkbox"/> | <input type="checkbox"/> |
| 3. Ich formuliere die Fragestellung mit anderen Worten.                                                                                                         | <input type="checkbox"/>        | <input type="checkbox"/> | <input type="checkbox"/> | <input type="checkbox"/> | <input type="checkbox"/> | <input type="checkbox"/> |
| 4. Ich schreibe eine Antwort hin, die eher allgemein ist.                                                                                                       | <input type="checkbox"/>        | <input type="checkbox"/> | <input type="checkbox"/> | <input type="checkbox"/> | <input type="checkbox"/> | <input type="checkbox"/> |
| 5. Ich lasse die Aufgabe weg.                                                                                                                                   | <input type="checkbox"/>        | <input type="checkbox"/> | <input type="checkbox"/> | <input type="checkbox"/> | <input type="checkbox"/> | <input type="checkbox"/> |
| 6. Ich überlege, was ich zu dem Thema schon weiß.                                                                                                               | <input type="checkbox"/>        | <input type="checkbox"/> | <input type="checkbox"/> | <input type="checkbox"/> | <input type="checkbox"/> | <input type="checkbox"/> |
| 7. Ich schaue auf die Zeit, die ich noch habe und überlege, wie viel Zeit mir für das Lösen dieser Aufgabe bleibt. Dann entscheide ich, wie ich weiter vorgehe. | <input type="checkbox"/>        | <input type="checkbox"/> | <input type="checkbox"/> | <input type="checkbox"/> | <input type="checkbox"/> | <input type="checkbox"/> |
| 8. Bevor ich etwas aufschreibe, überlege ich nochmal: Ist das, was ich verstanden habe, wirklich richtig?                                                       | <input type="checkbox"/>        | <input type="checkbox"/> | <input type="checkbox"/> | <input type="checkbox"/> | <input type="checkbox"/> | <input type="checkbox"/> |

**Vielen Dank!**
