# Supplementary material for: Metakognitives Strategiewissen in sprachbezogenen Situationen
Source: Atypon-hosted journal article supplement (doi:10.1026/0012-1924/a000275), 2021-07-29
Supplement: 0012-1924_a000275_esm2.pdf [file 0012-1924_a000275_esm2.pdf]

Deskriptive Statistiken der Einzelitems und Skalen

|             | Items | $\alpha$ | M    | SD   | Trennschärfe<br>Szenarien | Trennschärfe<br>Gesamttest | Itemschwierigkeit |
|-------------|-------|----------|------|------|---------------------------|----------------------------|-------------------|
|             | 52    | .88      |      |      |                           |                            |                   |
| Szenario 1  | 8     | .73      | 6.39 | 1.87 |                           |                            |                   |
| S1A02<S1A07 |       |          |      |      | .19                       | .15                        | .78               |
| S1A03<S1A06 |       |          |      |      | .31                       | .33                        | .85               |
| S1A05>S1A01 |       |          |      |      | .46                       | .26                        | .71               |
| S1A05>S1A02 |       |          |      |      | .57                       | .32                        | .81               |
| S1A05>S1A03 |       |          |      |      | .58                       | .30                        | .86               |
| S1A05>S1A04 |       |          |      |      | .61                       | .26                        | .79               |
| S1A06>S1A04 |       |          |      |      | .34                       | .34                        | .76               |
| S1A07>S1A03 |       |          |      |      | .35                       | .26                        | .83               |
| Szenario 2  | 7     | .73      | 5.11 | 1.88 |                           |                            |                   |
| S2A03<S2A05 |       |          |      |      | .52                       | .26                        | .78               |
| S2A05>S2A01 |       |          |      |      | .59                       | .21                        | .79               |
| S2A05>S2A02 |       |          |      |      | .58                       | .34                        | .83               |
| S2A05>S2A04 |       |          |      |      | .36                       | .20                        | .56               |
| S2A06>S2A01 |       |          |      |      | .26                       | .27                        | .63               |
| S2A07>S2A01 |       |          |      |      | .44                       | .35                        | .75               |
| S2A07>S2A03 |       |          |      |      | .41                       | .36                        | .78               |
| Szenario 3  | 11    | .80      | 9.67 | 2.03 |                           |                            |                   |
| S3A01<S3A06 |       |          |      |      | .48                       | .29                        | .79               |
| S3A02<S3A06 |       |          |      |      | .41                       | .33                        | .92               |
| S3A03<S3A06 |       |          |      |      | .40                       | .36                        | .91               |
| S3A04<S3A06 |       |          |      |      | .31                       | .29                        | .93               |
| S3A05<S3A06 |       |          |      |      | .45                       | .31                        | .93               |
| S3A05<S3A07 |       |          |      |      | .58                       | .39                        | .88               |
| S3A05<S3A08 |       |          |      |      | .38                       | .32                        | .85               |
| S3A07>S3A01 |       |          |      |      | .56                       | .40                        | .78               |
| S3A07>S3A02 |       |          |      |      | .49                       | .37                        | .89               |
| S3A07>S3A03 |       |          |      |      | .45                       | .37                        | .86               |
| S3A07>S3A04 |       |          |      |      | .50                       | .43                        | .93               |
| Szenario 4  | 11    | .77      | 9.08 | 2.31 |                           |                            |                   |
| S4A01<S4A04 |       |          |      |      | .50                       | .32                        | .87               |
| S4A02<S4A04 |       |          |      |      | .49                       | .34                        | .84               |
| S4A02<S4A06 |       |          |      |      | .47                       | .40                        | .79               |
| S4A02<S4A07 |       |          |      |      | .22                       | .19                        | .87               |
| S4A03<S4A04 |       |          |      |      | .40                       | .28                        | .80               |
| S4A05<S4A04 |       |          |      |      | .47                       | .32                        | .82               |
| S4A05<S4A06 |       |          |      |      | .55                       | .44                        | .78               |
| S4A05<S4A07 |       |          |      |      | .31                       | .27                        | .83               |
| S4A06>S4A01 |       |          |      |      | .54                       | .48                        | .83               |
| S4A06>S4A03 |       |          |      |      | .43                       | .36                        | .77               |
| S4A07>S4A01 |       |          |      |      | .28                       | .27                        | .87               |
| Szenario 5  | 9     | .80      | 7.80 | 1.88 |                           |                            |                   |
| S5A01>S5A07 |       |          |      |      | .41                       | .25                        | .94               |
| S5A02>S5A06 |       |          |      |      | .56                       | .42                        | .81               |
| S5A02>S5A07 |       |          |      |      | .61                       | .40                        | .86               |
| S5A03<S5A01 |       |          |      |      | .45                       | .36                        | .93               |
| S5A03<S5A02 |       |          |      |      | .62                       | .46                        | .88               |

|             |   |     |      |      |     |     |     |
|-------------|---|-----|------|------|-----|-----|-----|
| S5A03<S5A04 |   |     |      |      | .57 | .46 | .87 |
| S5A03<S5A05 |   |     |      |      | .31 | .27 | .86 |
| S5A04>S5A06 |   |     |      |      | .42 | .26 | .79 |
| S5A04>S5A07 |   |     |      |      | .51 | .35 | .87 |
| Szenario 6  | 6 | .78 | 4.29 | 1.81 |     |     |     |
| S6A04<S6A07 |   |     |      |      | .11 | .18 | .95 |
| S6A08>S6A01 |   |     |      |      | .67 | .40 | .71 |
| S6A08>S6A02 |   |     |      |      | .58 | .35 | .67 |
| S6A08>S6A03 |   |     |      |      | .64 | .36 | .75 |
| S6A08>S6A05 |   |     |      |      | .53 | .36 | .60 |
| S6A08>S6A06 |   |     |      |      | .59 | .40 | .62 |

---

Anmerkungen: N = 290.
