# Supplementary material for: Metakognitives Strategiewissen in sprachbezogenen Situationen
Source: Atypon-hosted journal article supplement (doi:10.1026/0012-1924/a000275), 2021-07-29
Supplement: 0012-1924_a000275_esm3.pdf [file 0012-1924_a000275_esm3.pdf]

Tabelle der Personenparameter

| Score | theta | error | % cumulative |
|-------|-------|-------|--------------|
| 8     | -3,80 | 0,39  | 0,3          |
| 17    | -2,76 | 0,31  | 0,7          |
| 20    | -2,48 | 0,30  | 1,0          |
| 21    | -2,39 | 0,30  | 1,4          |
| 23    | -2,22 | 0,30  | 1,7          |
| 24    | -2,13 | 0,30  | 2,1          |
| 25    | -2,04 | 0,29  | 2,4          |
| 26    | -1,96 | 0,29  | 2,8          |
| 28    | -1,79 | 0,29  | 4,5          |
| 29    | -1,70 | 0,30  | 5,5          |
| 30    | -1,62 | 0,30  | 6,9          |
| 31    | -1,53 | 0,30  | 7,9          |
| 32    | -1,44 | 0,30  | 8,6          |
| 33    | -1,35 | 0,30  | 10,3         |
| 34    | -1,26 | 0,31  | 12,1         |
| 35    | -1,16 | 0,31  | 14,5         |
| 36    | -1,07 | 0,32  | 16,6         |
| 37    | -0,97 | 0,32  | 20,0         |
| 38    | -0,86 | 0,33  | 23,8         |
| 39    | -0,76 | 0,33  | 29,3         |
| 40    | -0,64 | 0,34  | 31,4         |
| 41    | -0,53 | 0,35  | 35,2         |
| 42    | -0,40 | 0,36  | 42,4         |
| 43    | -0,27 | 0,38  | 47,2         |
| 44    | -0,12 | 0,39  | 52,1         |
| 45    | 0,04  | 0,41  | 58,3         |
| 46    | 0,21  | 0,44  | 65,2         |
| 47    | 0,41  | 0,47  | 72,8         |
| 48    | 0,65  | 0,51  | 77,9         |
| 49    | 0,93  | 0,57  | 84,8         |
| 50    | 1,30  | 0,67  | 89,7         |
| 51    | 1,84  | 0,85  | 95,2         |
| 52    | 2,97  | 1,45  | 100,0        |
